# Supplementary material for: Anion-dependent crystallization of zinc complexes with the ligand 4′,5′-diaza-9′-(4,5-disubstituted-1,3-dithiol-2-ylidene) fluorene: Structures and spectroscopic properties
Source: Royal Society of Chemistry journal article supplement (doi:10.1039/c0ce00424c), 2011-01-01
Supplement: c0ce00424c.pdf [file c0ce00424c.pdf]

**Supporting Information for:**

**Anion-Dependent Crystallization of Zinc Complexes with Ligand  
4',5'-Diaza-9'-(4,5-Disubstituted-1,3-Dithiol-2-Ylidene) Fluorene:  
Structures and Spectroscopic Properties**

**Qin-Yu Zhu,\* Lei Yu, Yu-Rong Qin, Li-Bin Huo, Ming-Yan Shao and Jie Dai\***

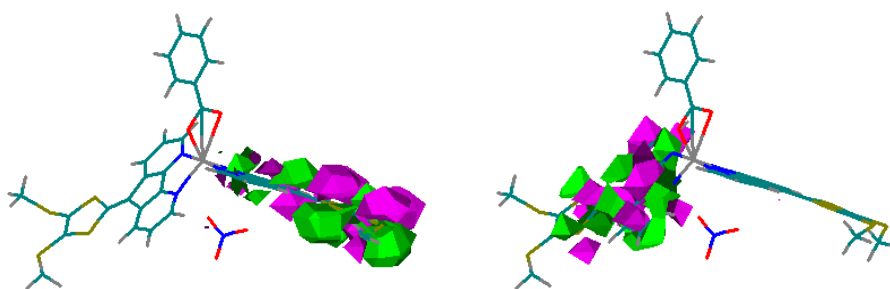

SI-Fig. 1. Calculated atomic orbital population for the HOMO (left) and LUMO (right) of **2**

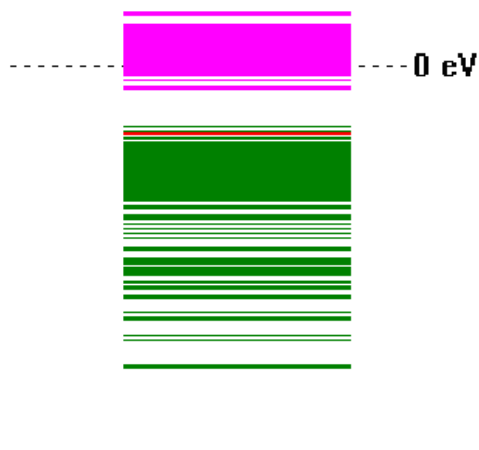

SI-Fig. 2. Calculated energy level of **2**

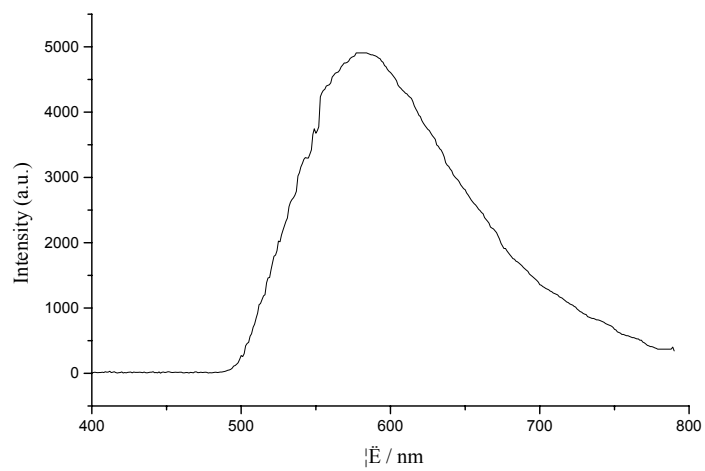

SI-Fig. 3. Emission spectra of the complex **6** (upon excitation at 330 nm) in dichloromethane solution at room temperature.
